# Supplementary material
Source: Springer Nature journal article supplement (https://www.springermedizin.de/resource/supplementary/12883_2013_832_MOESM2_ESM.pdf/9456282)
Supplement: MOESM2 [file 9456282]

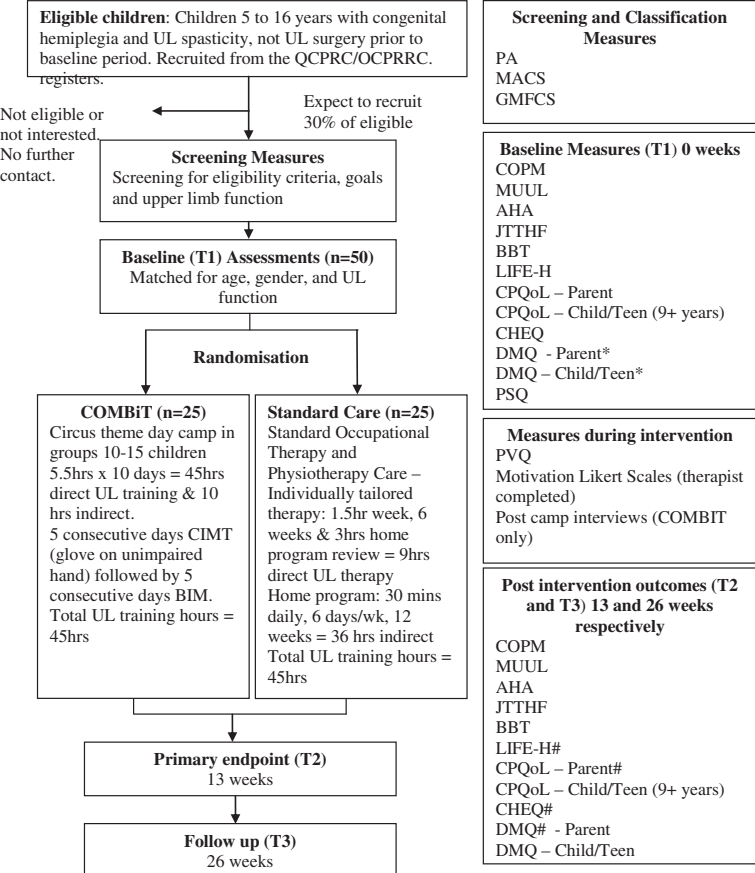

**Key:-**  
AHA- Assisting Hand Assessment. BBT- Box and Blocks Test. CHEQ- Children's Hand Use Experience Questionnaire. CPQoL- Adult, Cerebral Palsy Quality of Life – Adult. CPQoL- Child, Cerebral Palsy Quality of Life – Child. COPM- Canadian Occupational Performance Measure. DMQ- Child/Teen, Dimensions of Mastery Questionnaire – Child/Teen. DMQ– Parent, Dimensions of Mastery Questionnaire – Parent. GMFCS – Gross Motor Function Classification System. JTTHF- Jepsen Taylor Test of Hand Function. LIFE-H- Assessment of Life Habits. MACS- Manual Ability Classification System. MUUL- Melbourne Assessment of Unilateral Upper Limb Function. PA- Physical Upper Limb Assessment. SQ- Study Questionnaire. UL- Upper limb. PSQ- Triple P Parenting Scale Questionnaire. PVQ- Pediatric Volitional Questionnaire
